# Supplementary material for: A connexin/ifi30 pathway bridges HSCs with their niche to dampen oxidative stress
Source: Springer Nature journal article supplement (doi:10.1038/s41467-021-24831-0), 2021-07-23
Supplement: MOESM4 [file 41467_2021_24831_MOESM4_ESM.pdf]

## Description of Additional Supplementary Files

---

### Supplementary Movie 1

Time-lapse imaging of the CHT of an *kdrl:mcherry;cmvb:GFP* embryo injected with control-morpholino (12ng, 42-48hpf).

### Supplementary Movie 2

Time-lapse imaging of the CHT of an *kdrl:mcherry;cmvb:GFP* embryo injected with *ifi30*-morpholino (12ng, 42-48hpf).

### Supplementary Movie 3

Time-lapse imaging of the circulation in a non-treated *globin:GFP* embryo (48hpf). Representative video from 9 embryos.

### Supplementary Movie 4

Time-lapse imaging of the circulation in a heptanol-treated (50 $\mu$ M) *globin:GFP* embryo (48hpf). Blood circulation is comparable to the control. Representative video from 9 embryos.

### Supplementary Movie 5

Time-lapse imaging of the heart in a non-treated *myl7:DsRed* embryo (48hpf). Blood circulation is slowed down compared to control and heptanol (50 $\mu$ M) treated embryos. Representative video from 9 embryos.

### Supplementary Movie 6

Time-lapse imaging of the heart in a heptanol-treated (50 $\mu$ M) *myl7:DsRed* embryo (48hpf). Representative video from 9 embryos.

### Supplementary Movie 7

Time-lapse imaging of the circulation in a heptanol-treated (1mM) *globin:GFP* embryo (48hpf). Heart beatings are comparable to control embryos. Representative video from 9 embryos.

### Supplementary Movie 8

Time-lapse imaging of the heart in a heptanol-treated (1mM) *myl7:DsRed* embryo (48hpf). The video shows defect in heart beatings, compared to control and heptanol (50 $\mu$ M) treated embryos. Representative video from 9 embryos.

### Supplementary Movie 9

Time-lapse imaging of the CHT in a non-treated *kdrl:mcherry;cmvb:GFP* embryo (41-48hpf).

### Supplementary Movie 10

Time-lapse imaging of the CHT in a heptanol-treated (50 $\mu$ M, 41-48hpf) *kdrl:mcherry;cmvb:GFP* embryo.

---
